# Supplementary material
Source: ML conference proceedings conference paper supplement (https://proceedings.neurips.cc/paper_files/paper/2013/hash/6d70cb65d15211726dcce4c0e971e21c-Abstract.html)
Supplement: Supplementary file [file 6d70cb65d15211726dcce4c0e971e21c-Supplemental.zip]

## A Appendix: Proofs

*Proof of Lemma 2.* The discretized set of possible weights for  $p'(x)$  is  $w' \in \{0, \frac{M}{r^\ell}, \dots, \frac{M}{r}\}$ . Rescaling by a factor of  $r2^{b(\ell-1)}/M$ , this is equivalent to a rescaled set of weights

$$w'' \in \{0, (2^b - 1)^{\ell-1}, 2^b(2^b - 1)^{\ell-2}, \dots, 2^{(\ell-2)b}(2^b - 1), 2^{(\ell-1)b}\}$$

For any  $i = 0 \dots, \ell - 1$ , let  $x \in \mathcal{B}_i$ . Then by definition there are precisely  $(2^b - 1)^i 2^{(\ell-1-i)b}$  valid assignments of  $(y_1^1, y_1^2, \dots, y_1^b, y_2^1, \dots, y_2^b, \dots, y_{\ell-1}^1, \dots, y_{\ell-1}^b)$  such that  $(x, y) \in \mathcal{S}(w, \ell, b)$ . Thus,  $x$  is sampled with probability proportional to  $w''(x)$  as desired. Now suppose  $x \in \mathcal{B}_\ell$ . Then  $w(x) \leq \frac{M}{r^\ell}$ , so  $x$  is sampled with probability zero by definition of  $\mathcal{S}(w, \ell, b)$  simply because there is no valid assignment to the  $y$  variables such that  $(x, y) \in \mathcal{S}(w, \ell, b)$ .  $\square$

*Proof of Lemma 3.* Let  $T \leftarrow 24 \lceil \ln(n'/\delta) \rceil$  as in Algorithm 1. For  $t \in \{1, \dots, T\}$ , let  $S_i^t = |\{(x, y) \in \mathcal{S} : h_{A,c}^i(x, y) = 0\}|$  be the number of elements of  $\mathcal{S}$  that satisfy  $h_{A,c}^i(x, y) = 0$ , i.e., “survive” after adding  $i$  random parity constraints. The output of COMPUTEK is nothing but

$$k = \min \{ \min \{ i \mid \text{Median}(S_i^1, \dots, S_i^T) < P \}, n' \}$$

where the default value  $n'$  is taken if the inner “min” is over an empty set. It follows from pairwise independence of the chosen hash functions that:

$$\mu_i \triangleq \mathbb{E}[S_i^t] = \frac{Z}{2^i}, \quad \sigma_i^2 \triangleq \text{Var}[S_i^t] = \frac{Z}{2^i} \left( 1 - \frac{1}{2^i} \right)$$

For  $i \leq k_P^*$ , Chebychev inequality yields:

$$\mathbb{P}[S_i^t < P] \leq \mathbb{P}[|S_i^t - \mu_i| > (\mu_i - P)] \leq \frac{\sigma_i^2}{(\mu_i - P)^2} \leq \frac{Z/2^i}{(Z/2^i - P)^2}$$

The RHS is an increasing function of  $i$ , so for  $i \leq k_P^* - \gamma$ , which implies  $Z/2^i \leq P2^\gamma$ , we have  $\mathbb{P}[S_i^t < P] \leq 2^\gamma / ((2^\gamma - 1)^2 P) \triangleq 1 - q$ . For  $P \geq 2^{\gamma+2} / (2^\gamma - 1)^2$ , we thus have  $\mathbb{P}[S_i^t < P] \leq 1/4$  and  $q \geq 3/4$ . In other words, more than half the  $S_i^t$  are expected to be at least as large as  $P$ . Using Chernoff inequality,

$$\mathbb{P}[\text{Median}(S_i^1, \dots, S_i^T) \geq P] = 1 - \mathbb{P}[|\{t \mid S_i^t < P\}| < T/2] \geq 1 - \exp\left(-\frac{1}{2q}T\left(q - \frac{1}{2}\right)^2\right).$$

Similarly, for  $i \geq k_P^* + \gamma$ , we have  $\mu_i < P$  and from Chebychev Inequality

$$\mathbb{P}[S_i^t \geq P] \leq \mathbb{P}[|S_i^t - \mu_i| \geq (P - \mu_i)] \leq \frac{\sigma_i^2}{(\mu_i - P)^2} \leq \frac{Z/2^i}{(Z/2^i - P)^2} \leq 2^\gamma / ((2^\gamma - 1)^2 P) \leq \frac{1}{4}.$$

Using Chernoff inequality for  $i \geq k_P^* + \gamma$ ,

$$\mathbb{P}[\text{Median}(S_i^1, \dots, S_i^T) < P] \geq 1 - \exp\left(-\frac{1}{2q}T\left(q - \frac{1}{2}\right)^2\right).$$

Combining these two observations, we get that

$$\begin{aligned} & \mathbb{P}[k_P^* - \gamma \leq \min \{ i \mid \text{Median}(S_i^1, \dots, S_i^T) < P \} \leq \lceil k_P^* + \gamma \rceil] \geq \\ & \mathbb{P}\left[\bigcap_{i=1}^{\lceil k_P^* - \gamma \rceil} (\text{Median}(S_i^1, \dots, S_i^T) \geq P) \bigcap (\text{Median}(S_{\lceil k_P^* + \gamma \rceil}^1, \dots, S_{\lceil k_P^* + \gamma \rceil}^T) < P)\right] \geq \\ & 1 - n' \exp\left(-\frac{4}{6}T\left(\frac{3}{4} - \frac{1}{2}\right)^2\right) = 1 - n' \exp(-\beta T) \geq 1 - \delta \end{aligned}$$

for  $T \geq \frac{1}{\beta} \ln(n'/\delta)$  where  $\beta = \frac{1}{24}$ . It holds trivially that

$$k_P^* = \log Z - \log P \leq n' - \log P$$

so from  $\lceil k_P^* + \gamma \rceil \leq 1 + k_P^* + \gamma$  we also get

$$\mathbb{P}[k_P^* - \gamma \leq k \leq 1 + k_P^* + \gamma] \geq 1 - \delta$$

This finishes the proof.  $\square$

*Proof of Lemma 4.* It can be verified that  $\gamma = \log((P + 2\sqrt{P+1} + 2)/P)$  is the unique positive solution to  $P = 2^{\gamma+2}/(2^\gamma - 1)^2$ . Therefore,  $\gamma$  and  $P$  satisfy the conditions of Lemma 3. Let  $k$  be the output of procedure `COMPUTE $K(n', \delta, P, \mathcal{S})$` . Then from Lemma 3, we have that  $\mathbb{P}[k_P^* - \gamma \leq k \leq k_P^* + 1 + \gamma] \geq 1 - \delta$ . All probabilities below are implicitly conditioned on this event. Let

$$S_i = |\{(x, y) \in \mathcal{S}(w, \ell, b), h_{A,c}^i(x, y) = 0\}| = |\mathcal{S}(w, \ell, b)^i| = |\mathcal{S}^i|$$

be the number of solutions surviving after adding  $i$  random parity constraints. It follows from pairwise independence of the hash functions (Definition 3) that

$$\mu_i \triangleq \mathbb{E}[S_i] = \frac{Z}{2^i}, \quad \sigma_i^2 \triangleq \text{Var}[S_i] = \frac{Z}{2^i} \left(1 - \frac{1}{2^i}\right)$$

Let  $\alpha \geq \gamma$  and  $i = k + \alpha$ . Then

$$\mu_{k+\alpha} = \frac{Z}{2^{k+\alpha}} \leq \frac{P}{2^{\alpha-\gamma}}$$

that is, on average we are left with less than  $P$  elements after adding  $i$  random parity constraints. Let  $\sigma = (x, y) \in \mathcal{S}(w, \ell, b)$  be an element of the set we want to sample from. The probability  $p_s(\sigma)$  that  $\sigma$  is output is

$$\begin{aligned} p_s(\sigma) &\triangleq \mathbb{P}[S_i < P, \sigma \in \mathcal{S}(w, \ell, b)^i] \frac{1}{P-1} \\ &= \mathbb{P}[S_i < P \mid \sigma \in \mathcal{S}(w, \ell, b)^i] \mathbb{P}[\sigma \in \mathcal{S}(w, \ell, b)^i] \frac{1}{P-1} \end{aligned}$$

where for any  $\sigma$ ,  $\mathbb{P}[\sigma \in \mathcal{S}(w, \ell, b)^i] = 2^{-i}$ . Thus we have

$$p_s(\sigma) = \mathbb{P}[S_i < P \mid \sigma \in \mathcal{S}(w, \ell, b)^i] \frac{2^{-i}}{P-1} \quad (3)$$

Now the expected value of the size of the set (and its variance) conditioned on  $\sigma \in \mathcal{S}(w, \ell, b)^i$  are independent of  $\sigma$  because of three-wise independence [5]. So we have

$$\begin{aligned} \mathbb{E}[S_i \mid \sigma \in \mathcal{S}(w, \ell, b)^i] &= 1 + \frac{(Z-1)}{2^i} = \mu_i(\sigma) \\ \text{Var}[S_i \mid \sigma \in \mathcal{S}(w, \ell, b)^i] &= \frac{(Z-1)}{2^i} \left(1 - \frac{1}{2^i}\right) < \mathbb{E}[S_i \mid \sigma \in \mathcal{S}(w, \ell, b)^i] \end{aligned}$$

We first note that  $(Z-1)/2^i < Z/2^i = Z/2^{k+\alpha} \leq Z/2^{k_P^*-\gamma+\alpha} = P2^{\gamma-\alpha}$ . Using Chebychev's inequality

$$\begin{aligned} \mathbb{P}[S_i \geq P \mid \sigma \in \mathcal{S}(w, \ell, b)^i] &\leq \mathbb{P}[|S_i - \mu_i(\sigma)| \geq (P - \mu_i(\sigma)) \mid \sigma \in \mathcal{S}(w, \ell, b)^i] \\ &\leq \frac{\frac{(Z-1)}{2^i} (1 - \frac{1}{2^i})}{(P - (1 + \frac{(Z-1)}{2^i}))^2} \leq \frac{P2^{\gamma-\alpha} (1 - \frac{1}{2^i})}{(P-1 - P2^{\gamma-\alpha})^2} \leq \frac{2^{\gamma-\alpha}}{(1 - \frac{1}{P} - 2^{\gamma-\alpha})^2} \triangleq 1 - c(\alpha, P) \end{aligned}$$

Plugging into (3) we get

$$c(\alpha, P) \frac{2^{-i}}{P-1} = \left(1 - \frac{2^{\gamma-\alpha}}{(1 - \frac{1}{P} - 2^{\gamma-\alpha})^2}\right) \frac{2^{-i}}{P-1} \leq p_s(\sigma) \leq \frac{2^{-i}}{P-1} \quad (4)$$

where  $c(\alpha, P) \rightarrow 1$  as  $\alpha \rightarrow \infty$ . This shows that the sampling probabilities  $p_s(\sigma)$  and  $p_s(\sigma')$  of  $\sigma$  and  $\sigma'$ , respectively, must be within a constant factor  $c(\alpha, P)$  of each other.

From  $k \leq k_P^* + 1 + \gamma$  it follows that

$$p_s(\sigma) \geq c(\alpha, P) \frac{2^{-(1+\gamma+\alpha)}}{Z} \frac{P}{P-1}$$

This shows that the probability that the algorithm does not output  $\perp$  is at least

$$\mathbb{P}[\text{output} \neq \perp] = Q = \sum_{\sigma \in \mathcal{S}(w, \ell, b)} p_s(\sigma) \geq c(\alpha, P) 2^{-(1+\gamma+\alpha)} \frac{P}{P-1}$$

The probability  $p'_s(\sigma)$  that  $\sigma$  is sampled given that the algorithm does not output  $\perp$  is

$$\frac{\mathbb{P}[S_i < P, \sigma \in \mathcal{S}(w, \ell, b)^i, \text{output} \neq \perp]}{Q} = \frac{\mathbb{P}[S_i < P, \sigma \in \mathcal{S}(w, \ell, b)^i]}{Q} = \frac{p_s(\sigma)}{Q} = p'_s(\sigma)$$

Plugging in (4)

$$c(\alpha, P) \frac{2^{-i}}{P-1} \frac{1}{Q} \leq p'_s(\sigma) \leq \frac{2^{-i}}{P-1} \frac{1}{Q}$$

From  $\sum_{\sigma} p'_s(\sigma) = 1$  we get

$$c(\alpha, P) \frac{2^{-i}}{P-1} \frac{1}{Q} Z \leq 1 \leq \frac{2^{-i}}{P-1} \frac{1}{Q} Z$$

which implies

$$c(\alpha, P) \frac{1}{Z} \leq c(\alpha, P) \frac{2^{-i}}{P-1} \frac{1}{Q} \leq p'_s(\sigma) \leq \frac{2^{-i}}{P-1} \frac{1}{Q} \leq \frac{1}{c(\alpha, P)} \frac{1}{Z}$$

This finishes the proof.  $\square$

*Proof of Corollary 2.* Suppose we want to compute an expectation of  $\phi : \{0, 1\}^n \rightarrow \mathbb{R}$

$$\begin{aligned} \mathbb{E}_p[\phi] &= \sum_{x \in \{0, 1\}^n} p(x) \phi(x) = \sum_{x \in \{0, 1\}^n \setminus \mathcal{B}_\ell} p(x) \phi(x) + \sum_{x \in \mathcal{B}_\ell} p(x) \phi(x) \\ \sum_{x \in \{0, 1\}^n \setminus \mathcal{B}_\ell} p(x) \phi(x) - \epsilon \eta_\phi &\leq \mathbb{E}_p[\phi] \leq \sum_{x \in \{0, 1\}^n \setminus \mathcal{B}_\ell} p(x) \phi(x) + \epsilon \eta_\phi \end{aligned}$$

From Theorem 1

$$\sum_{x \in \{0, 1\}^n \setminus \mathcal{B}_\ell} \frac{1}{\rho \kappa} p(x) \phi(x) \leq \mathbb{E}_{p'_s}[\phi] = \sum_{x \in \{0, 1\}^n \setminus \mathcal{B}_\ell} p'_s(x) \phi(x) \leq \sum_{x \in \{0, 1\}^n \setminus \mathcal{B}_\ell} \rho \kappa p(x) \phi(x)$$

It follows that

$$\frac{1}{\rho \kappa} \mathbb{E}_{p'_s}[\phi] - \epsilon \eta_\phi \leq \mathbb{E}_p[\phi] \leq \rho \kappa \mathbb{E}_{p'_s}[\phi] + \epsilon \eta_\phi$$

as desired.  $\square$
